# Supplementary material for: Detection and molecular characterization of Actinomyces denticolens causing lymph node abscessation in horses
Source: Front Vet Sci. 2023 Jul 20;10:1225528. doi: 10.3389/fvets.2023.1225528 (PMC10399742; doi:10.3389/fvets.2023.1225528)
Supplement: Supplementary file 1 [file Table_1.XLSX]

## Sheet: export1
Species	Strain	Allelic profile atpA	Allelic profile gltA	Alelic profile gyrA	Allelic profile metG	Allelic profile pgi	Allelic profile pheS	Allelic profile rpoB	MLST ST
A. denticolens	GDB-38104	60	70	71	70	73	70	61	110
A. denticolens	GDB-38528	61	70	71	70	71	70	62	111
A. denticolens	GDB-43843	60	71	71	70	72	71	62	112
A. denticolens	strain Chiba 101	60	70	70	71	70	72	60	113
A. denticolens	strain NCTC 11490	60	1	70	1	70	72	60	114
A. gaoshouyii	strain pika 114	70	80	120	100	80	80	70	120
A. slackii	strain NCTC 11923	160	170	90	130	90	90	110	130
A. radicidents	strain CCUG 36733	90	120	100	140	220	150	120	140
A. weissii	strain CCUG 61299	190	130	170	180	210	100	190	150
A. howelii	strain NCTC 11636	130	110	110	150	200	130	130	160
A. qiguomlingii	strain sp410	80	180	160	160	190	110	80	170
A. israelii	strain NCTC 12972	100	140	200	190	100	120	200	180
A. provencensis	strain SN12	120	190	210	170	110	160	180	190
Supplementary Table 1. Allelic profiles assigned from the seven housekeeping genes and the MLST ST for the species A. denticolens, A. gaoshouyii, A. slackii, A. radicidents, A. weissii, A. howelii, A. qiguomlingii, A. israelii and A. provencensis in the extended Actinomyces spp. MLST scheme.
